# Supplementary material for: Linkage Analysis and Multi-Locus Genome-Wide Association Studies Identify QTNs Controlling Soybean Plant Height
Source: Front Plant Sci. 2020 Feb 14;11:9. doi: 10.3389/fpls.2020.00009 (PMC7033546; doi:10.3389/fpls.2020.00009)
Supplement: Supplementary file 4 [file Table_3.xlsx]

## Sheet: Sheet1
Table S3 Detailed information on 21 QTLs detected in multiple environments
QTL	Environment	Chromosome	Position	LeftMarker	RightMarker	LOD	PVE (%)	Add	LeftCI	RightCI	Method
qPH-D1a-1	E1/E2	1	136/135	AZ302047	satt402	8.56/7.77	4.56/2.50	10.78/14.66	131.5/130.5	141.5/139.5	IM
qPH-D1a-2	E1/E2/E5/E7/E5	1	51/50/56/54/56	Sat_413	Sat_160	2.83/5.27/4.75/3.65/4.75	4.54/2.52/2.64/5.71/2.64	12.18/16.28/17.27/17.56/17.27	37.5/45.5/51.5/50.5/51.5	56.5/54.5/60.5/58.5/60.5	IM/IM/IM/IM/ICIM
qPH-D1a-3	E1/E2/E1/E2	1	120/120/119/120	satt515	AZ302047	7.91/8.35/4.90/2.64	3.18/1.60/9.38/3.22	9.25/11.92/6.33/5.14	116.5/116.5/113.5/113.5	123.5/123.5/123.5/125.5	IM/IM/ICIM/ICIM
qPH-N-2	E1/E3/E3	3	24/22/22	Satt584	Satt660	3.14/2.92/2.92	1.12/1.45/1.75	-8.28/9.67/9.67	19.5/21.5/21.5	28.5	IM/IM/ICIM
qPH-C1-1	E1/E2/E2	4	7/12/11	Satt713	satt565	3.79/13.46/10.84	1.91/2.74/19.55	6.95/15.47/12.80	0/7.5/6.5	14.5/15.5/14.5	IM/IM/ICIM
qPH-M-2	E1/E2	7	93/95	satt626	satt245	3.42/2.91	1.33/0.55	5.91/6.92	84.5/88.5	100	IM
qPH-A2-1	E2/E7/E7	8	30/28/28	satt119	sat_406	2.97/3.13/3.13	1.13/4.31/6.93	13.12/16.38/16.38	24.5/14.5/14.5	35.5/31.5/31.5	IM/IM/ICIM
qPH-A2-2	E1/E2	8	71/70	satt424	satt233	4.45/6.87	2.27/1.64	7.55/11.65	64.5/65.5	79/75.5	IM
qPH-K-1	E1/E2	9	11/12	Sat_087	Satt167	4.18/6.50	3.06/2.58	9.23/15.44	4.5/7.5	16.5/15.5	IM
qPH-K-2	E1/E2	9	52	Sat_243	satt673	3.30/3.02	3.76/1.63	-9.61/-11.52	47.5/46.5	55.5	IM
qPH-O-2	E1/E2	10	43/42	satt479	Sat_341	4.25/5.52	3.99/2.52	10.68/14.98	36.5/37.5	48.5/46.5	IM
qPH-B1-1	E1/E2/E2	11	37/36/36	satt197	sat_123	5.15/7.27/4.86	3.99/2.12/9.79	12.07/15.44/10.64	31.5/32.5/26.5	41.5/39.5/41.5	IM/IM/ICIM
qPH-H-1	E1/E2/E1	12	13/15/12	Satt181	satt434	7.00/6.50/4.84	2.33/1.02/7.04	8.41/10.05/5.82	10.5/11.5/6.5	16.5/19/17.5	IM/IM/ICIM
qPH-F-1	E2/E5/E6/E7/E8/E5/E6/E7/E8	13	76/62/62/62/53/62/62/63/53	sat_039	Sat_417	6.97/3.29/5.16/4.31/3.33/3.29/5.16/3.58/3.33	1.14/3.02/2.28/5.22/3.49/3.02/2.28/7.69/10.72	-9.55/15.15/16.14/14.20/-9.59/15.15/16.14/13.27/-9.59	72.5/58.5/59.5/58.5/47.5/58.5/59.5/59.5/47.5	80.5/64.5/65.5/65.5/58.5/64.5/65.5/68.5/58.5	IM/IM/IM/IM/IM/ICIM/ICIM/ICIM/ICIM
qPH-F-2	E1/E2	13	108/106	satt334	SOYHSP176	3.56/6.81	1.17/0.85	5.45/8.43	102.5	112.5/109.5	IM
qPH-J-1	E1/E2	16	46	Satt414	Sat_255	2.86/4.49	0.79/0.55	-4.55/-6.92	42.5/43.5	52.5-51.5	IM
qPH-J-2	E1/E2	16	24/19	Satt596	Satt414	2.54/6.00	1.15/2.27	5.45/13.89	9.5/14.5	32.5/30.5	IM
qPH-D1-1	E1/E2	17	75	sat_333	sat_194	3.78/4.80	1.85/0.91	7.71/9.77	70.5	79.5/80.5	IM
qPH-D1-2	E1/E2	17	59/58	satt186	sat_333	2.58/4.14	1.18/0.78	5.93/8.63	52.5	66.5/64.5	IM
qPH-G-2	E1/E2	18	8/9	sat_403	satt309	4.53/5.51	2.55/1.44	7.99/10.86	0/4.5	13.5/14.5	IM
qPH-L-1	E1/E1/E2	19	52	sat_195	satt448	4.67/4.58/8.20	3.02/14.83/14.00	13.19/11.54/16.03	49.5	51.5/60.5/55.5	IM/ICIM/ICIM
